# Supplementary material
Source: PubMed Central journal article supplement (PMC4815091)
Supplement: supp_tpc.15.00391_TPC2015-00391-RAR2_Supplemental_Data.pdf [file supp_tpc.15.00391_TPC2015-00391-RAR2_Supplemental_Data.pdf]

## Supplemental data

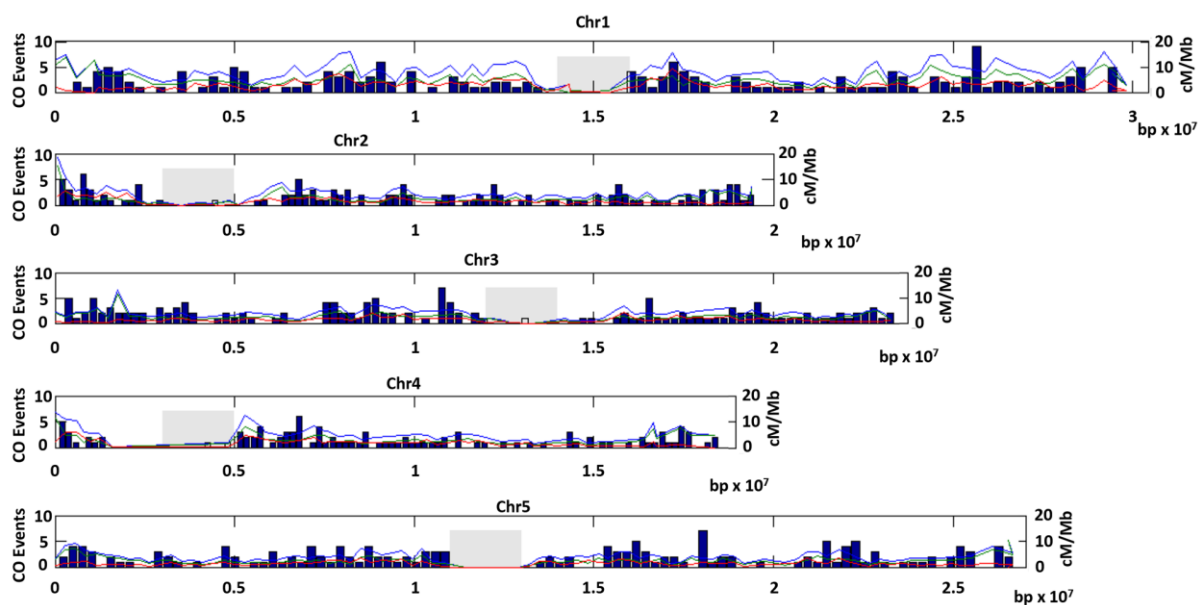

### Supplemental Figure 1. Distribution of CO events.

Distribution of the 737 CO events dataset along 5 chromosomes of *A. thaliana* (blue bars). The lines show the CO rate of male (green), female (red) and the sum of both (blue) (Giraut et al., 2011). Pericentric region (~ 2 Mb around the centromere) is shown as a grey box.

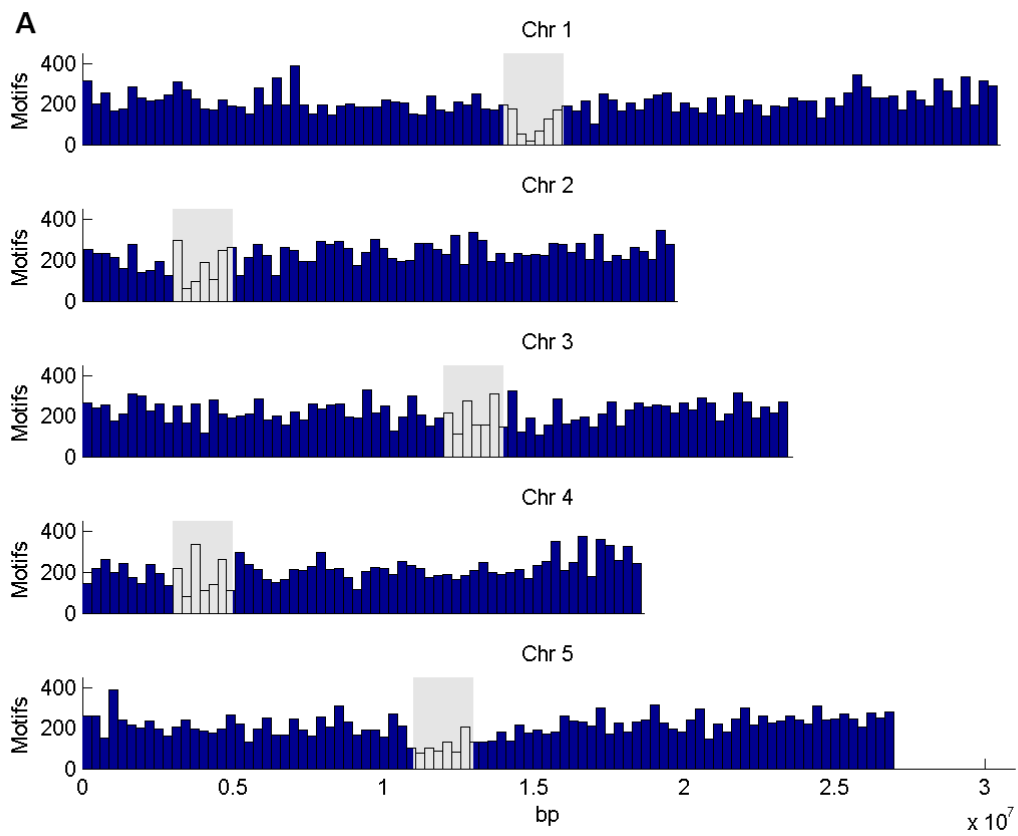

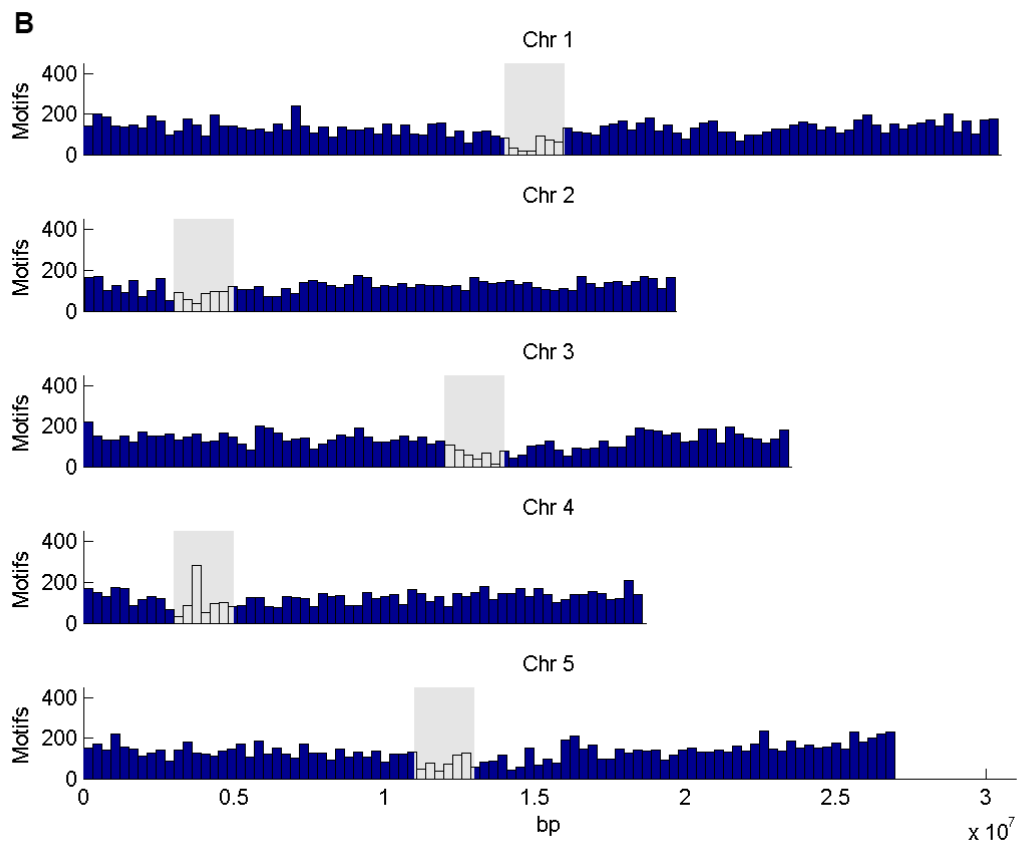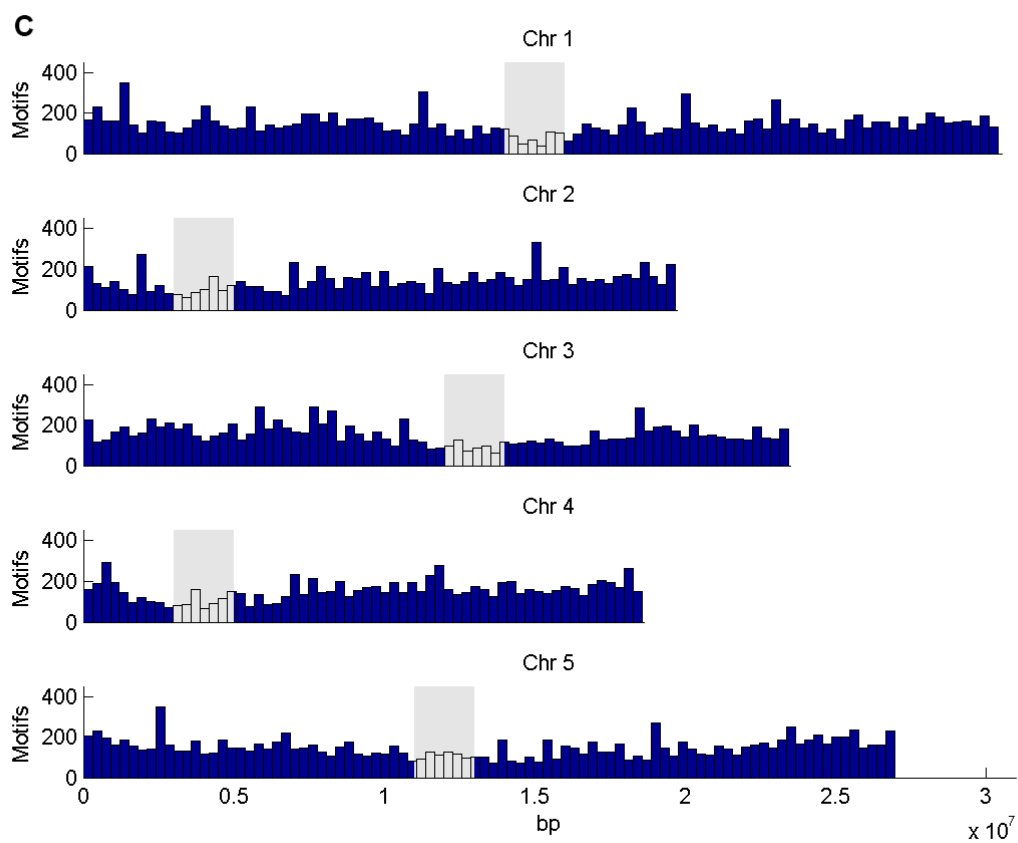

**Supplemental Figure 2. Distribution of the three crossover motifs.**

The distribution of the (A) A-rich, (B) CTT and (C) CCN motifs (blue bars) is shown for all 5 chromosomes. The pericentric region (~ 2 Mb around the centromere) is shown as a grey box.

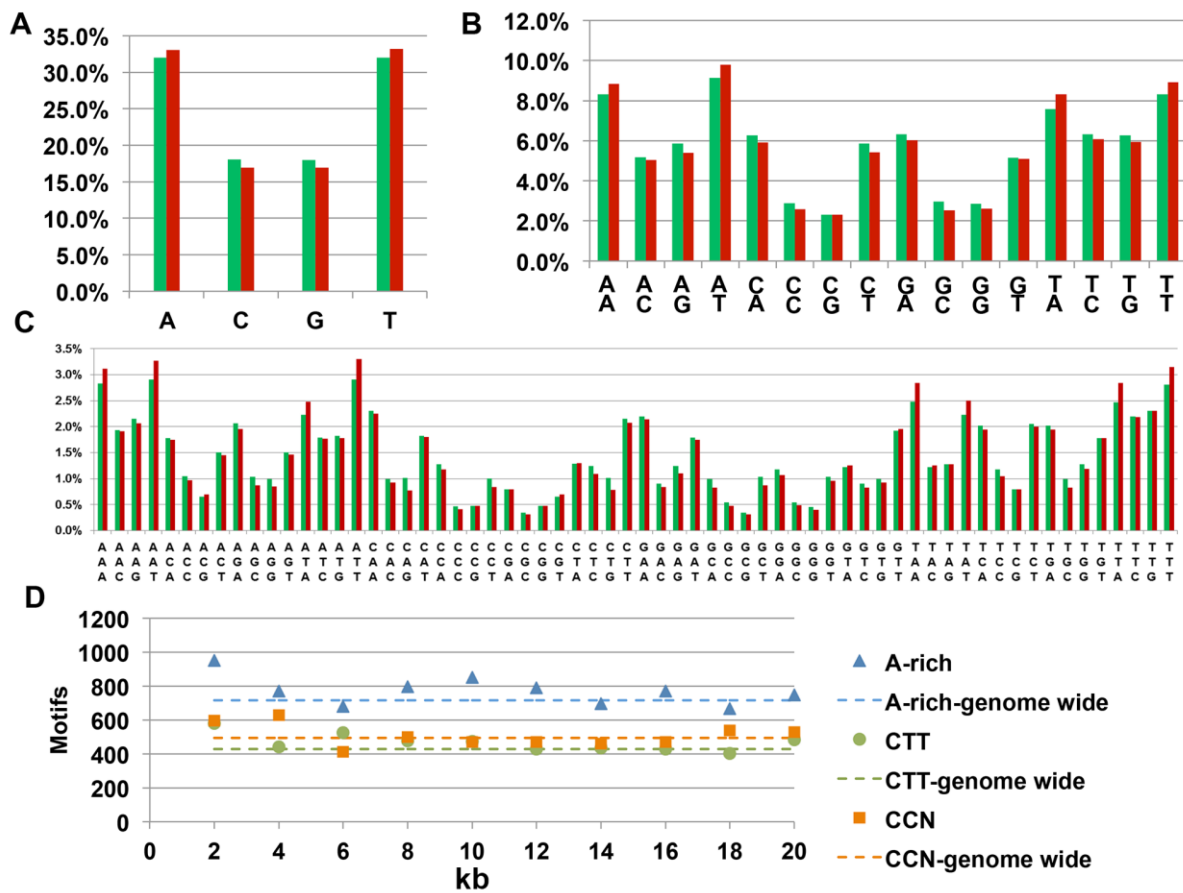

**Supplemental Figure 3. AT/GC content and motif signal.**

The AT content in CO sites (red) in comparison to the genome wide rate (green) for (A) mono (B) di and (C) tri nucleotides. (D) Motif abundance in windows of 2 kb distance from the CO site. A-rich (triangles), CTT-repeat (circles), CCN motifs (squares).

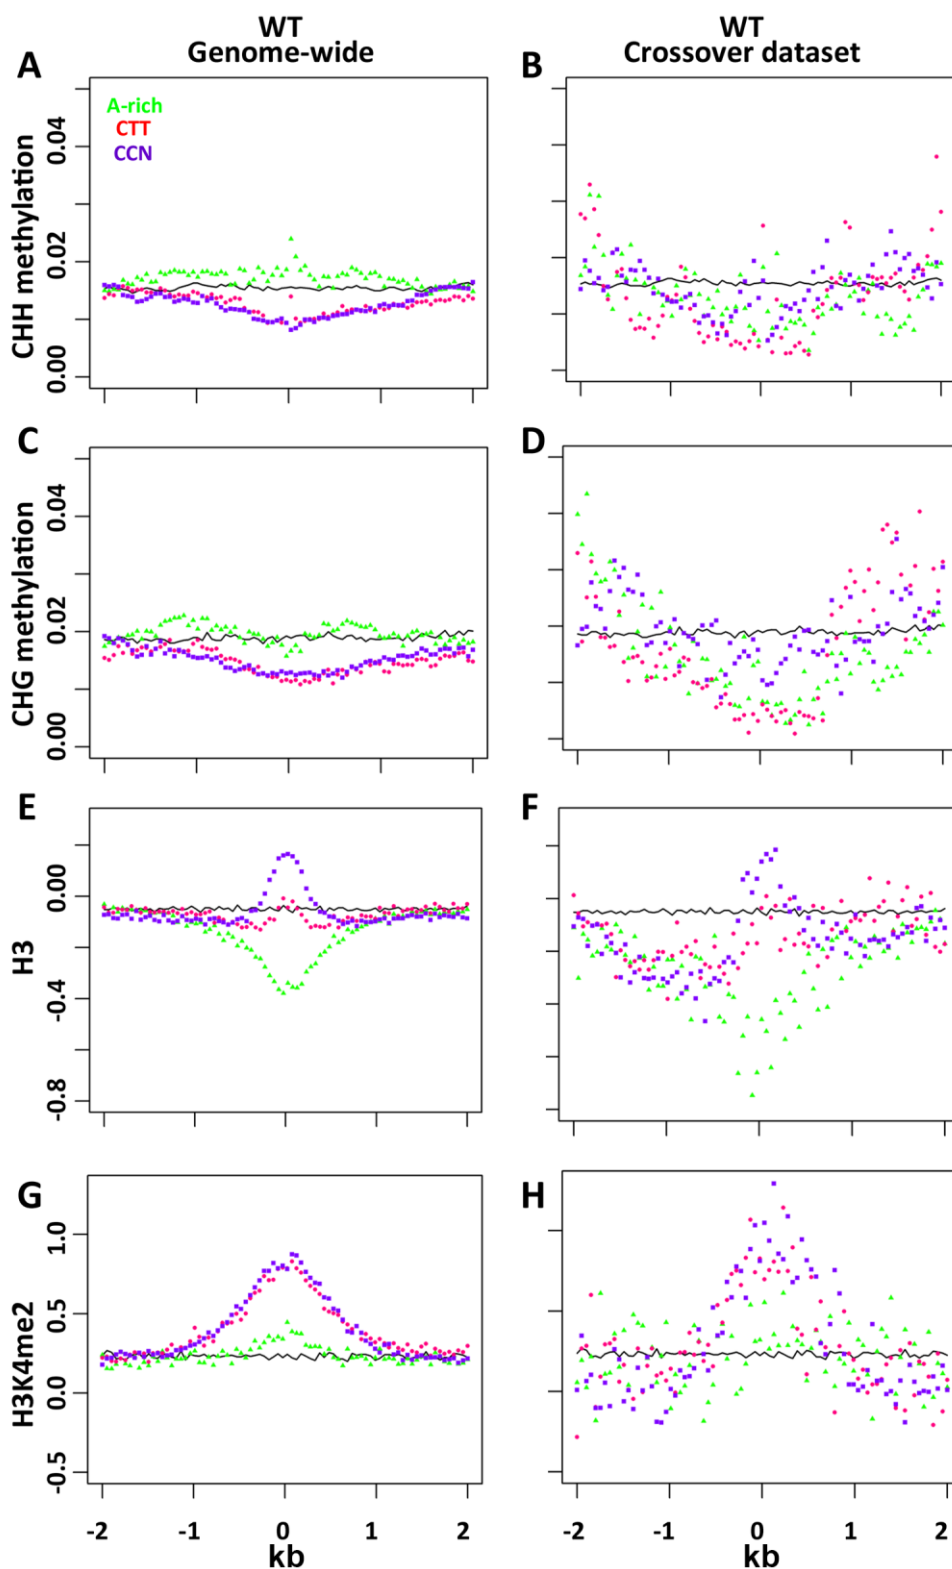

**Supplemental Figure 4. Epigenetic modifications around all the motifs.**

Epigenetic markers around the CCN-repeat (purple square), CTT-repeat (red circle), the A-rich CO motifs (green triangle) and the randomly picked control sequences (continuous black lines) are shown. The data are the average from hot and cold

recombination regions around the three motifs and are shown on the Y-axis for 50 bp bins from the centre of the X axis and up to 2000 bp upstream and downstream of the motifs. The analysis was performed on genome wide dataset (A,C,E,G) and the crossover dataset (B,D,F,H). The epigenetic markers analysed are CHH methylation (A,B); CHG methylation (C,D); H3 occupancy (E,F) and H3K4me2 (G,H).

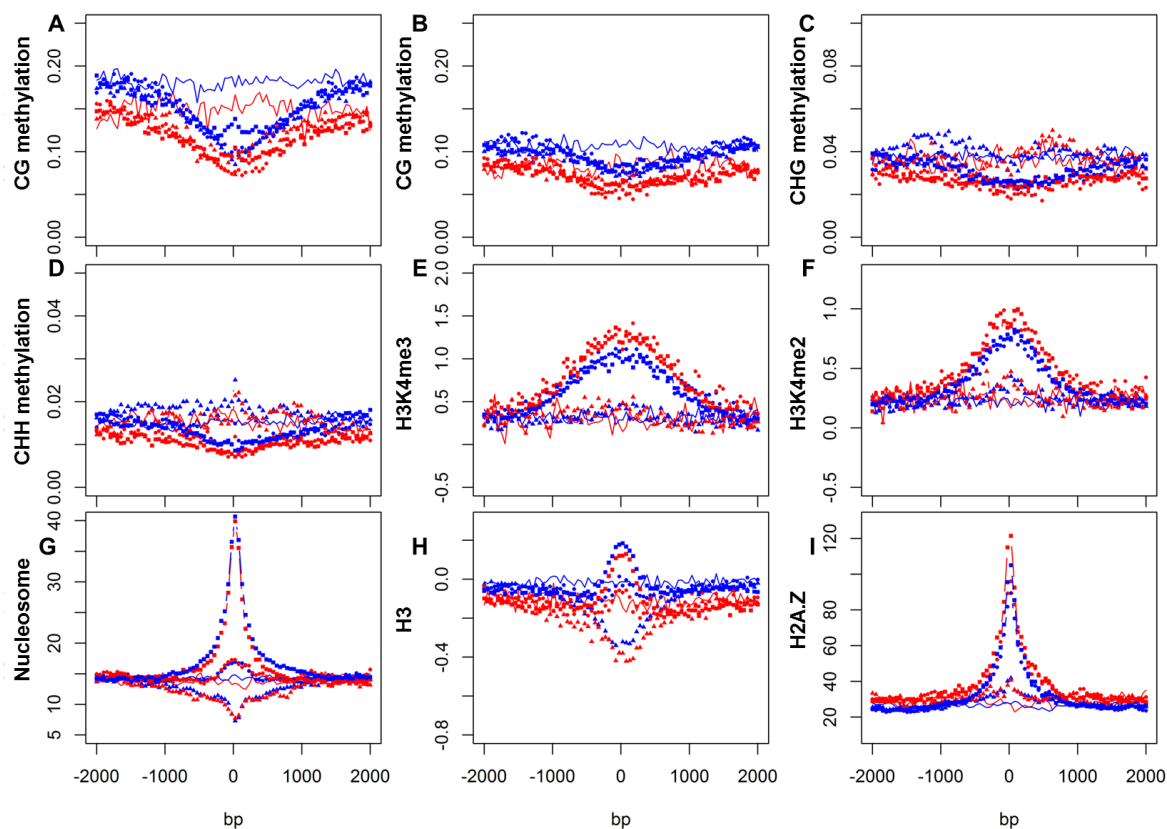

**Supplemental Figure 5. Average epigenetic modifications 2000 bp around all the motifs in hot and cold intervals.**

Averaged data are shown for the A-rich (triangles), CTT (circles), CCN motifs (squares) and a clear line for random control, in hot (red) or cold (blue) intervals. (A) CG methylation in wild-type plants. (B) CG methylation in *ddm1* mutant. (C) CHG methylation. (D) CHH methylation. (E) H3K4me3. (F) H3K4me2. (G) Nucleosome occupancy (H) H3 occupancy. (I) H2A.Z.

**Supplemental Table 1. Number of reads yield from a lane of hi-seq Illumina machine of two different library preparation protocols.**

| Library preparation                   | Sample | Paired reads | % of lane | Fold    |
|---------------------------------------|--------|--------------|-----------|---------|
| Illumina                              | GFP5   | 22859951     | 15.08     | 19.04   |
| Illumina                              | GFP6   | 19981382     | 13.18     | 16.65   |
| Illumina                              | GFP7   | 10766399     | 7.11      | 8.97    |
| Illumina                              | GFP8   | 6802176      | 4.49      | 5.67    |
| Illumina                              | RFP5   | 13562178     | 8.954     | 11.32   |
| Illumina                              | RFP6   | 12864547     | 8.49      | 10.72   |
| Illumina                              | RFP7   | 14521412     | 9.58      | 12.1    |
| Illumina                              | RFP8   | 50167156     | 33.11     | 41.81   |
|                                       | sum    | 151525201    | 100       | 126.271 |
| ChIP seq (Blecher-Gonen et al., 2013) | GFP10  | 8471940      | 5.78      | 7.06    |
| ChIP seq (Blecher-Gonen et al., 2013) | GFP11  | 10490252     | 7.16      | 8.74    |
| ChIP seq (Blecher-Gonen et al., 2013) | GFP12  | 9118655      | 6.23      | 7.6     |
| ChIP seq (Blecher-Gonen et al., 2013) | GFP14  | 8049317      | 5.5       | 6.71    |
| ChIP seq (Blecher-Gonen et al., 2013) | GFP15  | 8126462      | 5.55      | 6.77    |
| ChIP seq (Blecher-Gonen et al., 2013) | GFP16  | 8680000      | 5.93      | 7.23    |
| ChIP seq (Blecher-Gonen et al., 2013) | GFP17  | 11054374     | 7.55      | 9.21    |
| ChIP seq (Blecher-Gonen et al., 2013) | RFP10  | 6774641      | 4.63      | 5.65    |
| ChIP seq (Blecher-Gonen et al., 2013) | RFP11  | 8401876      | 5.74      | 7       |
| ChIP seq (Blecher-Gonen et al., 2013) | RFP12  | 8412500      | 5.74      | 7.01    |
| ChIP seq (Blecher-Gonen et al., 2013) | RFP13  | 10875360     | 7.43      | 9.06    |
| ChIP seq (Blecher-Gonen et al., 2013) | RFP14  | 9682359      | 6.61      | 8.07    |
| ChIP seq (Blecher-Gonen et al., 2013) | RFP15  | 14545559     | 9.93      | 12.12   |
| ChIP seq (Blecher-Gonen et al., 2013) | RFP16  | 7399680      | 5.05      | 6.17    |
| ChIP seq (Blecher-Gonen et al., 2013) | RFP17  | 8010410      | 5.45      | 6.68    |
| ChIP seq (Blecher-Gonen et al., 2013) | RFP19  | 8360097      | 5.71      | 6.97    |
|                                       | sum    | 146453482    | 100       | 122.05  |
| Difference between the methods        |        | 5071719      | 3.4       | 4.23    |
